# Supplementary material
Source: PubMed Central journal article supplement (PMC4414657)
Supplement: NIHMS632594-supplement-1.pdf [file NIHMS632594-supplement-1.pdf]

Center: \_\_\_ Site: \_\_\_ Network No. \_\_\_

Mother's Initials (optional) : \_\_\_

Record No. \_\_\_

Page 1 of 1

This form is to be completed by bedside caregiver(s) after each recording.

1. Date of aEEG recording

\_\_\_/\_\_\_/\_\_\_  
Month Day Year

2. Did the aEEG equipment interfere with your ability to assess or provide care for this patient? \_\_\_

|                |              |                   |
|----------------|--------------|-------------------|
| 1 = Not at all | 2 = Somewhat | 3 = Significantly |
|----------------|--------------|-------------------|

a. If 3, please describe \_\_\_\_\_

\_\_\_\_\_  
\_\_\_\_\_  
\_\_\_\_\_

3. Were clinical activities delayed due to the aEEG recording? Y N

If YES, please code activity delayed and duration of delay

| Delay No. | a. Duration | b. Please describe |
|-----------|-------------|--------------------|
| 1         | ___         | _____              |
| 2         | ___         | _____              |
| 3         | ___         | _____              |
| 4         | ___         | _____              |
| 5         | ___         | _____              |
| 6         | ___         | _____              |

Key used by research personnel for question #3

Description codes for PaEEG05, Survey of Bedside Caregivers

|                             |                                     |
|-----------------------------|-------------------------------------|
| 01 = Blood draw             | 07 = PT/OT assessment/therapy       |
| 02 = Central line insertion | 08 = Subspecialty consult           |
| 03 = Cranial ultrasound     | 09 = Kangaroo care                  |
| 04 = Other ultrasound       | 10 = Weight or length measurement   |
| 05 = X-ray                  | 11 = Head circumference measurement |
| 06 = CT or MRI              | 12 = Other (specify)                |

Time codes for PaEEG05

|             |                   |                   |                   |             |
|-------------|-------------------|-------------------|-------------------|-------------|
| 1 = <15 min | 2 = 15 to <30 min | 3 = 30 to <45 min | 4 = 45 to <60 min | 5 = ≥60 min |
|-------------|-------------------|-------------------|-------------------|-------------|

Office Use Only

(see PaEEG04/manual)

| c. Time Code | d. Description Code |
|--------------|---------------------|
| ___          | ___                 |
| ___          | ___                 |
| ___          | ___                 |
| ___          | ___                 |
| ___          | ___                 |
| ___          | ___                 |

Initials of person completing this form \_\_\_\_\_
